# Supplementary material for: Liquid-phase step-by-step growth of an iron cyanide coordination framework on LiCoO2 particle surfaces
Source: Royal Society of Chemistry journal article supplement (doi:10.1039/c5dt00968e), 2015-01-01
Supplement: c5dt00968e1.pdf [file c5dt00968e1.pdf]

## Supplementary Information

### Liquid-phase step-by-step growth of an iron cyanide coordination framework on LiCoO<sub>2</sub> particle surfaces

Rie Makiura<sup>\*a,b,†</sup>, Shingo Teragawa<sup>c</sup>, Kohei Tsuchiyama<sup>a</sup>, Akitoshi Hayashi<sup>c</sup>,  
Kiyoharu Tadanaga<sup>c</sup> and Masahiro Tatsumisago<sup>c</sup>

<sup>a</sup> Nanoscience and Nanotechnology Research Center, Research Organization for the 21st Century, Osaka Prefecture University, Sakai, Osaka, Japan.

**E-mail: r-makiura@mtr.osakafu-u.ac.jp**

<sup>b</sup> PRESTO, Japan Science and Technology Agency, Saitama, Japan

<sup>c</sup> Department of Applied Chemistry, Graduate School of Engineering, Osaka Prefecture University, Sakai, Osaka, Japan

<sup>†</sup> Present address : Department of Materials Science, Graduate School of Engineering, Osaka Prefecture University, Sakai, Osaka, Japan

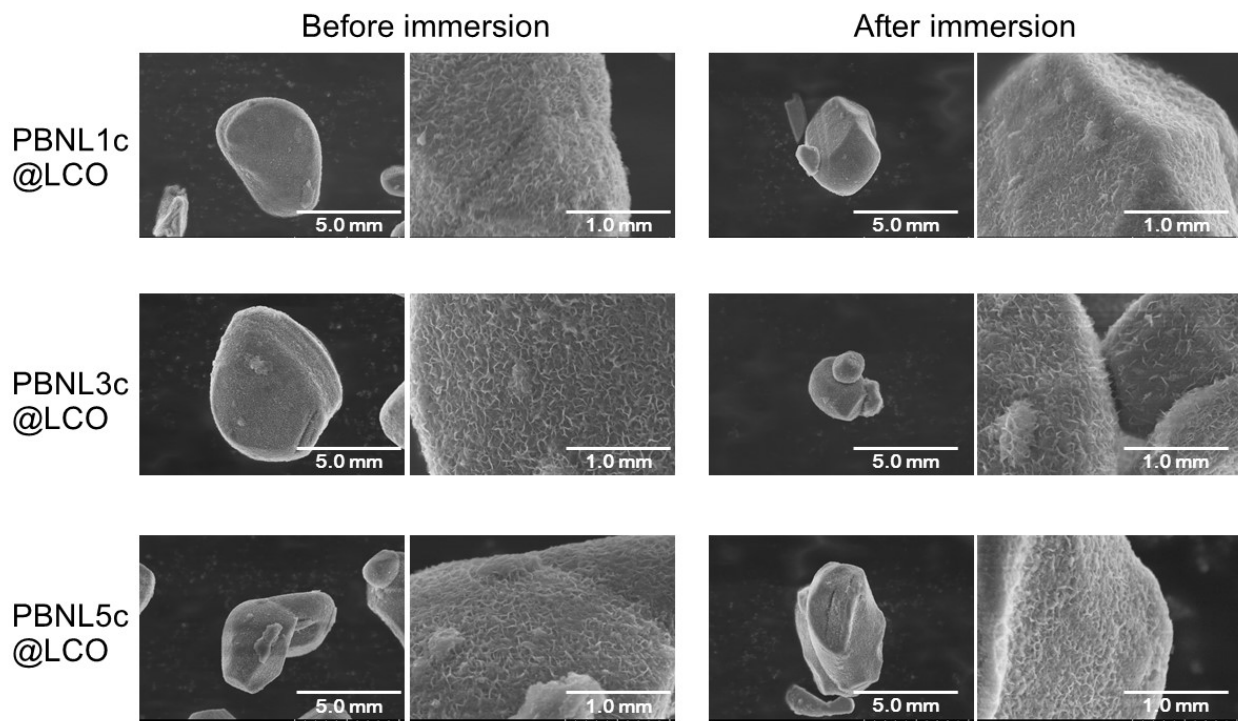

**Figure S1.** Morphology of the PBNL@LCO samples before and after immersion for 90 hours into the liquid electrolyte (1M  $\text{LiPF}_6$  in ethylene carbonate–diethyl carbonate (EC–DEC)) was observed by a scanning electron microscope (SEM, SU-8010, HITACHI). SEM images of the PBNL1c@LCO, PBNL3c@LCO and PBNL5c@LCO before (left) and after (right) immersion into the electrolyte.
